# Supplementary material for: Fatty acid metabolism-related genes are associated with flavor-presenting aldehydes in Chinese local chicken
Source: Front Genet. 2022 Aug 12;13:902180. doi: 10.3389/fgene.2022.902180 (PMC9412053; doi:10.3389/fgene.2022.902180)
Supplement: Supplementary file 1 [file Table2.xlsx]

## Sheet: Main pathways 
Table S2A. Main pathways of potential candidate genes.
Types	Genes	Pathways	Aldehydes
lipid metabolism	TGFA	MAPK signaling pathway	(E)-2-Decenal
lipid metabolism	RPS6KA5	MAPK signaling pathway	(E)-2-Decenal
lipid metabolism	MECOM	MAPK signaling pathway	(E,E)-2,4-Nonadienal
lipid metabolism	RPS6KA2	MAPK signaling pathway	(E,E)-2,4-Nonadienal
lipid metabolism	FGF18	MAPK signaling pathway	Decanal
lipid metabolism	RPS6KA2	MAPK signaling pathway	Benzaldehyde
lipid metabolism	ATF2	MAPK signaling pathway	Benzaldehyde
lipid metabolism	DUSP5	MAPK signaling pathway	Nonanal
lipid metabolism	PDGFA	MAPK signaling pathway	Nonanal
lipid metabolism	DUSP16	MAPK signaling pathway	Octadecanal
lipid metabolism	IL1B	MAPK signaling pathway	Octanal
lipid metabolism	FASLG	MAPK signaling pathway	Total Aldehydes
lipid metabolism	MAP4K3	MAPK signaling pathway	Total Aldehydes
lipid metabolism	FGF22	MAPK signaling pathway	Total Aldehydes
lipid metabolism	SOS1	MAPK signaling pathway	Total Aldehydes
lipid metabolism	PRKCI	Endocytosis	(E,E)-2,4-Nonadienal
lipid metabolism	SH3KBP1	Endocytosis	(E,E)-2,4-Nonadienal
lipid metabolism	EPS15	Endocytosis	Hexanal
lipid metabolism	WIPF1	Endocytosis	Benzaldehyde
lipid metabolism	RABEP1	Endocytosis	Benzaldehyde
lipid metabolism	LDLRAP1	Endocytosis	Nonanal
lipid metabolism	ASAP3	Endocytosis	Nonanal
lipid metabolism	RAB11FIP4	Endocytosis	Octanal
lipid metabolism	ASAP1	Endocytosis	Total Aldehydes
lipid metabolism	DNM3	Endocytosis	Total Aldehydes
lipid metabolism	RABEP1	Endocytosis	Total Aldehydes
lipid metabolism	HK2	Glycolysis / Gluconeogenesis	(E)-2-Decenal
lipid metabolism	GAPDH	Glycolysis / Gluconeogenesis	Octadecanal
lipid metabolism	GALM	Glycolysis / Gluconeogenesis	Total Aldehydes
lipid metabolism	ALDH9A1	Glycolysis / Gluconeogenesis	Hexanal
lipid metabolism	GPAM	Glycerophospholipid metabolism	Nonanal
lipid metabolism	PEMT	Glycerophospholipid metabolism	Octadecanal
lipid metabolism	CRLS1	Glycerophospholipid metabolism	Total Aldehydes
lipid metabolism	GPCPD1	Glycerophospholipid metabolism	Total Aldehydes
lipid metabolism	DGKE	Glycerophospholipid metabolism	Octanal
lipid metabolism	GPAM	Glycerolipid metabolism	Nonanal
lipid metabolism	AGK	Glycerolipid metabolism	Octadecanal
lipid metabolism	ALDH9A1	Glycerolipid metabolism	Hexanal
lipid metabolism	DGKE	Glycerolipid metabolism	Octanal
lipid metabolism	BTRC	Wnt signaling pathway	(E,E)-2,4-Nonadienal
lipid metabolism	LRP6	Wnt signaling pathway	Octadecanal
lipid metabolism	VANGL1	Wnt signaling pathway	Hexanal
lipid metabolism	GDF7	TGF-beta signaling pathway	(E)-2-Decenal
lipid metabolism	ID3	TGF-beta signaling pathway	Nonanal
lipid metabolism	GREM2	TGF-beta signaling pathway	Hexanal
lipid metabolism	ACSL5	PPAR signaling pathway	Nonanal
lipid metabolism	HMGCS2	PPAR signaling pathway	Total Aldehydes
lipid metabolism	ACSL5	Adipocytokine signaling pathway	Nonanal
lipid metabolism	PRKAB2	Adipocytokine signaling pathway	Total Aldehydes
lipid metabolism	ACSL5	Fatty acid degradation	Nonanal
lipid metabolism	ALDH9A1	Fatty acid degradation	Hexanal
lipid metabolism	MTMR3	Phosphatidylinositol signaling system	Nonanal
lipid metabolism	DGKE	Phosphatidylinositol signaling system	Octanal
lipid metabolism	MTMR3	Inositol phosphate metabolism	Nonanal
lipid metabolism	MECR	Fatty acid metabolism	Nonanal
lipid metabolism	ACSL5	Fatty acid metabolism	Nonanal
lipid metabolism	MECR	Fatty acid elongation	Nonanal
lipid metabolism	MECR	Fatty acid biosynthesis	Nonanal
lipid metabolism	ACSL5	Fatty acid biosynthesis	Nonanal
cell communication	CD80	Cell adhesion molecules (CAMs)	(E,E)-2,4-Nonadienal
cell communication	MPZ	Cell adhesion molecules (CAMs)	Benzaldehyde
cell communication	CADM3	Cell adhesion molecules (CAMs)	Benzaldehyde
cell communication	CD86	Cell adhesion molecules (CAMs)	Octadecanal
cell communication	CADM1	Cell adhesion molecules (CAMs)	Total Aldehydes
cell communication	SDC1	Cell adhesion molecules (CAMs)	Hexanal
cell communication	CADM1	Cell adhesion molecules (CAMs)	Hexanal
cell communication	CDH5	Cell adhesion molecules (CAMs)	Octanal
cell communication	ITGB3	Focal adhesion	Benzaldehyde
cell communication	PDGFA	Focal adhesion	Nonanal
cell communication	ACTB	Focal adhesion	Octadecanal
cell communication	SOS1	Focal adhesion	Total Aldehydes
cell communication	COL9A1	Focal adhesion	Hexanal
cell communication	PRKCI	Tight junction	(E,E)-2,4-Nonadienal
cell communication	NF2	Tight junction	Nonanal
cell communication	ACTB	Tight junction	Octadecanal
cell communication	PRKAB2	Tight junction	Total Aldehydes
cell communication	ITGB3	Regulation of actin cytoskeleton	Benzaldehyde
cell communication	FGF22	Regulation of actin cytoskeleton	Total Aldehydes
cell communication	SOS1	Regulation of actin cytoskeleton	Total Aldehydes
cell communication	FGF18	Regulation of actin cytoskeleton	Decanal
cell communication	PDGFA	Regulation of actin cytoskeleton	Nonanal
cell communication	ACTB	Regulation of actin cytoskeleton	Octadecanal
cell communication	LPAR5	Regulation of actin cytoskeleton	Octadecanal
cell communication	ADCY8	Gap junction	Total Aldehydes
cell communication	SOS1	Gap junction	Total Aldehydes
cell communication	ADCY3	Gap junction	Total Aldehydes
cell communication	SSX2IP	Adherens junction	Decanal
cell communication	ACTB	Adherens junction	Octadecanal
amino acid metabolism	CYP1A1	Tryptophan metabolism	Nonanal
amino acid metabolism	CYP1A2	Tryptophan metabolism	Nonanal
amino acid metabolism	ALDH9A1	Tryptophan metabolism	Hexanal
amino acid metabolism	HMGCS2	Valine, leucine and isoleucine degradation	Total Aldehydes
amino acid metabolism	ALDH9A1	Valine, leucine and isoleucine degradation	Hexanal
amino acid metabolism	ALDH9A1	Arginine and proline metabolism	Hexanal
amino acid metabolism	ALDH9A1	Histidine metabolism	Hexanal
amino acid metabolism	ALDH9A1	Lysine degradation	Hexanal
amino acid metabolism	ALDH9A1	beta-Alanine metabolism	Hexanal
amino acid metabolism	GAPDH	Biosynthesis of amino acids	Octadecanal

## Sheet:  KEGG of total aldehydes
Table S2B. KEGG of potential candidate genes in total aldehydes.
Pathway_name	Database	ID	Input number	Background number	P-Value	Corrected P-Value	Input	Hyperlink
Calcium signaling pathway	KEGG PATHWAY	gga04020	5	180	0.000644072	0.0634943	SLC8A1|P2RX1|ADCY3|ADCY8|ATP2A3	http://www.genome.jp/kegg-bin/show_pathway?gga04020/gga:395190%09red/gga:422013%09red/gga:395707%09red/gga:420328%09red/gga:395760%09red
Apelin signaling pathway	KEGG PATHWAY	gga04371	4	119	0.00116105	0.0733779	SLC8A1|PRKAB2|ADCY8|ADCY3	http://www.genome.jp/kegg-bin/show_pathway?gga04371/gga:422013%09red/gga:427017%09red/gga:420328%09red/gga:395760%09red
Adrenergic signaling in cardiomyocytes	KEGG PATHWAY	gga04261	4	128	0.00150657	0.0733779	SLC8A1|ADCY3|ADCY8|ATP2A3	http://www.genome.jp/kegg-bin/show_pathway?gga04261/gga:422013%09red/gga:395707%09red/gga:420328%09red/gga:395760%09red
Gap junction	KEGG PATHWAY	gga04540	3	84	0.00421455	0.108946	ADCY8|SOS1|ADCY3	http://www.genome.jp/kegg-bin/show_pathway?gga04540/gga:422013%09red/gga:431192%09red/gga:420328%09red
GnRH signaling pathway	KEGG PATHWAY	gga04912	3	84	0.00421455	0.108946	ADCY8|SOS1|ADCY3	http://www.genome.jp/kegg-bin/show_pathway?gga04912/gga:422013%09red/gga:431192%09red/gga:420328%09red
FoxO signaling pathway	KEGG PATHWAY	gga04068	3	123	0.011668	0.138808	PRKAB2|FASLG|SOS1	http://www.genome.jp/kegg-bin/show_pathway?gga04068/gga:427017%09red/gga:429064%09red/gga:431192%09red
RNA transport	KEGG PATHWAY	gga03013	3	132	0.0140358	0.138808	NUP88|GEMIN6|EIF4A3	http://www.genome.jp/kegg-bin/show_pathway?gga03013/gga:416704%09red/gga:417501%09red/gga:426266%09red
MAPK signaling pathway	KEGG PATHWAY	gga04010	4	261	0.0172668	0.138808	FGF22|MAP4K3|FASLG|SOS1	http://www.genome.jp/kegg-bin/show_pathway?gga04010/gga:429064%09red/gga:425965%09red/gga:100858338%09red/gga:431192%09red
Cardiac muscle contraction	KEGG PATHWAY	gga04260	2	66	0.0266128	0.138808	SLC8A1|ATP2A3	http://www.genome.jp/kegg-bin/show_pathway?gga04260/gga:395707%09red/gga:395760%09red
Progesterone-mediated oocyte maturation	KEGG PATHWAY	gga04914	2	78	0.0358775	0.138808	ADCY8|ADCY3	http://www.genome.jp/kegg-bin/show_pathway?gga04914/gga:422013%09red/gga:420328%09red
ErbB signaling pathway	KEGG PATHWAY	gga04012	2	78	0.0358775	0.138808	ABL2|SOS1	http://www.genome.jp/kegg-bin/show_pathway?gga04012/gga:395410%09red/gga:431192%09red
Synthesis and degradation of ketone bodies	KEGG PATHWAY	gga00072	1	10	0.04019	0.138808	HMGCS2	http://www.genome.jp/kegg-bin/show_pathway?gga00072/gga:424380%09red
Melanogenesis	KEGG PATHWAY	gga04916	2	91	0.0470965	0.144507	ADCY8|ADCY3	http://www.genome.jp/kegg-bin/show_pathway?gga04916/gga:422013%09red/gga:420328%09red
Glycerophospholipid metabolism	KEGG PATHWAY	gga00564	2	94	0.0498461	0.144507	CRLS1|GPCPD1	http://www.genome.jp/kegg-bin/show_pathway?gga00564/gga:428559%09red/gga:421311%09red
Oocyte meiosis	KEGG PATHWAY	gga04114	2	99	0.0545541	0.144638	ADCY8|ADCY3	http://www.genome.jp/kegg-bin/show_pathway?gga04114/gga:422013%09red/gga:420328%09red
Endocytosis	KEGG PATHWAY	gga04144	3	228	0.055175	0.145538	ASAP1|DNM3|RABEP1	http://www.genome.jp/kegg-bin/show_pathway?gga04144/gga:428385%09red/gga:395930%09red/gga:424389%09red
Spliceosome	KEGG PATHWAY	gga03040	2	107	0.062397	0.150744	SRSF7|EIF4A3	http://www.genome.jp/kegg-bin/show_pathway?gga03040/gga:416704%09red/gga:426265%09red
Terpenoid backbone biosynthesis	KEGG PATHWAY	gga00900	1	19	0.0718813	0.157469	HMGCS2	http://www.genome.jp/kegg-bin/show_pathway?gga00900/gga:424380%09red
Vascular smooth muscle contraction	KEGG PATHWAY	gga04270	2	117	0.0726991	0.158588	ADCY8|ADCY3	http://www.genome.jp/kegg-bin/show_pathway?gga04270/gga:422013%09red/gga:420328%09red
Insulin signaling pathway	KEGG PATHWAY	gga04910	2	121	0.0769642	0.163747	PRKAB2|SOS1	http://www.genome.jp/kegg-bin/show_pathway?gga04910/gga:427017%09red/gga:431192%09red
Purine metabolism	KEGG PATHWAY	gga00230	2	125	0.0813067	0.165387	ADCY8|ADCY3	http://www.genome.jp/kegg-bin/show_pathway?gga00230/gga:422013%09red/gga:420328%09red
Glycosylphosphatidylinositol (GPI)-anchor biosynthesis	KEGG PATHWAY	gga00563	1	22	0.0822134	0.165387	PIGC	http://www.genome.jp/kegg-bin/show_pathway?gga00563/gga:424387%09red
Apoptosis	KEGG PATHWAY	gga04210	2	127	0.0835061	0.167336	FASLG|PARP1	http://www.genome.jp/kegg-bin/show_pathway?gga04210/gga:429064%09red/gga:396199%09red
Necroptosis	KEGG PATHWAY	gga04217	2	131	0.0879589	0.169863	FASLG|PARP1	http://www.genome.jp/kegg-bin/show_pathway?gga04217/gga:429064%09red/gga:396199%09red
Butanoate metabolism	KEGG PATHWAY	gga00650	1	24	0.0890383	0.169863	HMGCS2	http://www.genome.jp/kegg-bin/show_pathway?gga00650/gga:424380%09red
Base excision repair	KEGG PATHWAY	gga03410	1	29	0.105882	0.184312	PARP1	http://www.genome.jp/kegg-bin/show_pathway?gga03410/gga:396199%09red
SNARE interactions in vesicular transport	KEGG PATHWAY	gga04130	1	29	0.105882	0.184312	SEC22B	http://www.genome.jp/kegg-bin/show_pathway?gga04130/gga:424377%09red
Herpes simplex virus 1 infection	KEGG PATHWAY	gga05168	2	150	0.110012	0.186479	SRSF7|FASLG	http://www.genome.jp/kegg-bin/show_pathway?gga05168/gga:429064%09red/gga:426265%09red
Protein processing in endoplasmic reticulum	KEGG PATHWAY	gga04141	2	153	0.113617	0.189484	DERL2|UBE2G1	http://www.genome.jp/kegg-bin/show_pathway?gga04141/gga:770961%09red/gga:417498%09red
Galactose metabolism	KEGG PATHWAY	gga00052	1	35	0.125687	0.199326	GALM	http://www.genome.jp/kegg-bin/show_pathway?gga00052/gga:426268%09red
Basal transcription factors	KEGG PATHWAY	gga03022	1	38	0.135427	0.20838	GTF2IRD1	http://www.genome.jp/kegg-bin/show_pathway?gga03022/gga:417487%09red
Valine, leucine and isoleucine degradation	KEGG PATHWAY	gga00280	1	44	0.154586	0.221387	HMGCS2	http://www.genome.jp/kegg-bin/show_pathway?gga00280/gga:424380%09red
Notch signaling pathway	KEGG PATHWAY	gga04330	1	44	0.154586	0.221387	NOTCH2	http://www.genome.jp/kegg-bin/show_pathway?gga04330/gga:374031%09red
Regulation of actin cytoskeleton	KEGG PATHWAY	gga04810	2	190	0.160263	0.223331	FGF22|SOS1	http://www.genome.jp/kegg-bin/show_pathway?gga04810/gga:100858338%09red/gga:431192%09red
Glycolysis / Gluconeogenesis	KEGG PATHWAY	gga00010	1	53	0.182539	0.240134	GALM	http://www.genome.jp/kegg-bin/show_pathway?gga00010/gga:426268%09red
Metabolic pathways	KEGG PATHWAY	gga01100	7	1290	0.2079	0.264011	HMGCS2|PIGC|ADCY3|PRDX6|ADCY8|CRLS1|GALM	http://www.genome.jp/kegg-bin/show_pathway?gga01100/gga:429062%09red/gga:426268%09red/gga:428559%09red/gga:422013%09red/gga:424387%09red/gga:424380%09red/gga:420328%09red
PPAR signaling pathway	KEGG PATHWAY	gga03320	1	64	0.215466	0.271697	HMGCS2	http://www.genome.jp/kegg-bin/show_pathway?gga03320/gga:424380%09red
Adipocytokine signaling pathway	KEGG PATHWAY	gga04920	1	64	0.215466	0.271697	PRKAB2	http://www.genome.jp/kegg-bin/show_pathway?gga04920/gga:427017%09red
Ribosome biogenesis in eukaryotes	KEGG PATHWAY	gga03008	1	67	0.224216	0.277319	REXO2	http://www.genome.jp/kegg-bin/show_pathway?gga03008/gga:419761%09red
mRNA surveillance pathway	KEGG PATHWAY	gga03015	1	70	0.232869	0.284618	EIF4A3	http://www.genome.jp/kegg-bin/show_pathway?gga03015/gga:416704%09red
Neuroactive ligand-receptor interaction	KEGG PATHWAY	gga04080	2	333	0.354943	0.392106	P2RX1|GRIN3B	http://www.genome.jp/kegg-bin/show_pathway?gga04080/gga:395190%09red/gga:429171%09red
Cell adhesion molecules (CAMs)	KEGG PATHWAY	gga04514	1	122	0.368563	0.403701	CADM1	http://www.genome.jp/kegg-bin/show_pathway?gga04514/gga:419762%09red
Ubiquitin mediated proteolysis	KEGG PATHWAY	gga04120	1	127	0.380285	0.411313	UBE2G1	http://www.genome.jp/kegg-bin/show_pathway?gga04120/gga:770961%09red
Phagosome	KEGG PATHWAY	gga04145	1	132	0.391793	0.422875	SEC22B	http://www.genome.jp/kegg-bin/show_pathway?gga04145/gga:424377%09red
Influenza A	KEGG PATHWAY	gga05164	1	135	0.398596	0.429321	FASLG	http://www.genome.jp/kegg-bin/show_pathway?gga05164/gga:429064%09red
mTOR signaling pathway	KEGG PATHWAY	gga04150	1	140	0.409767	0.438612	SOS1	http://www.genome.jp/kegg-bin/show_pathway?gga04150/gga:431192%09red
Cellular senescence	KEGG PATHWAY	gga04218	1	143	0.416371	0.443843	LIN9	http://www.genome.jp/kegg-bin/show_pathway?gga04218/gga:421316%09red
Tight junction	KEGG PATHWAY	gga04530	1	156	0.444154	0.468628	PRKAB2	http://www.genome.jp/kegg-bin/show_pathway?gga04530/gga:427017%09red
Focal adhesion	KEGG PATHWAY	gga04510	1	189	0.508944	0.528361	SOS1	http://www.genome.jp/kegg-bin/show_pathway?gga04510/gga:431192%09red
Cytokine-cytokine receptor interaction	KEGG PATHWAY	gga04060	1	202	0.532364	0.548271	FASLG	http://www.genome.jp/kegg-bin/show_pathway?gga04060/gga:429064%09red

## Sheet:  KEGG of hexanal
Table S2C. KEGG of potential candidate genes in hexanal.
Pathway_name	Database	ID	Input number	Background number	P-Value	Corrected P-Value	Input	Hyperlink
Drug metabolism - other enzymes	KEGG PATHWAY	gga00983	3	57	0.000360395	0.0462506	MGST3|NME7|UCK2	http://www.genome.jp/kegg-bin/show_pathway?gga00983/gga:100858145%09red/gga:424406%09red/gga:424404%09red
Pyrimidine metabolism	KEGG PATHWAY	gga00240	2	59	0.00873604	0.091844	NME7|UCK2	http://www.genome.jp/kegg-bin/show_pathway?gga00240/gga:100858145%09red/gga:424406%09red
Cardiac muscle contraction	KEGG PATHWAY	gga04260	2	66	0.0107636	0.091844	ATP1B1|CASQ2	http://www.genome.jp/kegg-bin/show_pathway?gga04260/gga:395198%09red/gga:396529%09red
ECM-receptor interaction	KEGG PATHWAY	gga04512	2	83	0.0164539	0.091844	SDC1|COL9A1	http://www.genome.jp/kegg-bin/show_pathway?gga04512/gga:421960%09red/gga:771873%09red
Ascorbate and aldarate metabolism	KEGG PATHWAY	gga00053	1	10	0.0250484	0.091844	ALDH9A1	http://www.genome.jp/kegg-bin/show_pathway?gga00053/gga:424405%09red
Cell adhesion molecules (CAMs)	KEGG PATHWAY	gga04514	2	122	0.0332064	0.103081	SDC1|CADM1	http://www.genome.jp/kegg-bin/show_pathway?gga04514/gga:419762%09red/gga:421960%09red
Histidine metabolism	KEGG PATHWAY	gga00340	1	21	0.0494804	0.114759	ALDH9A1	http://www.genome.jp/kegg-bin/show_pathway?gga00340/gga:424405%09red
Autophagy - other	KEGG PATHWAY	gga04136	1	28	0.0647141	0.127769	ATG3	http://www.genome.jp/kegg-bin/show_pathway?gga04136/gga:418369%09red
beta-Alanine metabolism	KEGG PATHWAY	gga00410	1	29	0.0668707	0.129373	ALDH9A1	http://www.genome.jp/kegg-bin/show_pathway?gga00410/gga:424405%09red
Pyruvate metabolism	KEGG PATHWAY	gga00620	1	32	0.0733111	0.133136	ALDH9A1	http://www.genome.jp/kegg-bin/show_pathway?gga00620/gga:424405%09red
Fatty acid degradation	KEGG PATHWAY	gga00071	1	33	0.0754482	0.134479	ALDH9A1	http://www.genome.jp/kegg-bin/show_pathway?gga00071/gga:424405%09red
Drug metabolism - cytochrome P450	KEGG PATHWAY	gga00982	1	34	0.0775805	0.134543	MGST3	http://www.genome.jp/kegg-bin/show_pathway?gga00982/gga:424404%09red
Intestinal immune network for IgA production	KEGG PATHWAY	gga04672	1	36	0.0818306	0.138179	TNFSF13B	http://www.genome.jp/kegg-bin/show_pathway?gga04672/gga:374229%09red
Metabolism of xenobiotics by cytochrome P450	KEGG PATHWAY	gga00980	1	36	0.0818306	0.138179	MGST3	http://www.genome.jp/kegg-bin/show_pathway?gga00980/gga:424404%09red
Tryptophan metabolism	KEGG PATHWAY	gga00380	1	39	0.0881696	0.143229	ALDH9A1	http://www.genome.jp/kegg-bin/show_pathway?gga00380/gga:424405%09red
Arginine and proline metabolism	KEGG PATHWAY	gga00330	1	42	0.0944657	0.148446	ALDH9A1	http://www.genome.jp/kegg-bin/show_pathway?gga00330/gga:424405%09red
Aminoacyl-tRNA biosynthesis	KEGG PATHWAY	gga00970	1	43	0.0965549	0.149292	DARS2	http://www.genome.jp/kegg-bin/show_pathway?gga00970/gga:424408%09red
Valine, leucine and isoleucine degradation	KEGG PATHWAY	gga00280	1	44	0.0986394	0.151299	ALDH9A1	http://www.genome.jp/kegg-bin/show_pathway?gga00280/gga:424405%09red
Notch signaling pathway	KEGG PATHWAY	gga04330	1	44	0.0986394	0.151299	APH1A	http://www.genome.jp/kegg-bin/show_pathway?gga04330/gga:431243%09red
Glutathione metabolism	KEGG PATHWAY	gga00480	1	47	0.104864	0.156032	MGST3	http://www.genome.jp/kegg-bin/show_pathway?gga00480/gga:424404%09red
Glycolysis / Gluconeogenesis	KEGG PATHWAY	gga00010	1	53	0.117188	0.167723	ALDH9A1	http://www.genome.jp/kegg-bin/show_pathway?gga00010/gga:424405%09red
Lysine degradation	KEGG PATHWAY	gga00310	1	54	0.119226	0.16938	ALDH9A1	http://www.genome.jp/kegg-bin/show_pathway?gga00310/gga:424405%09red
Glycerolipid metabolism	KEGG PATHWAY	gga00561	1	60	0.131356	0.181913	ALDH9A1	http://www.genome.jp/kegg-bin/show_pathway?gga00561/gga:424405%09red
TGF-beta signaling pathway	KEGG PATHWAY	gga04350	1	90	0.189586	0.235454	GREM2	http://www.genome.jp/kegg-bin/show_pathway?gga04350/gga:421507%09red
Spliceosome	KEGG PATHWAY	gga03040	1	107	0.220864	0.26656	PRPF3	http://www.genome.jp/kegg-bin/show_pathway?gga03040/gga:426667%09red
Lysosome	KEGG PATHWAY	gga04142	1	110	0.226259	0.27137	LAPTM4A	http://www.genome.jp/kegg-bin/show_pathway?gga04142/gga:421959%09red
Autophagy - animal	KEGG PATHWAY	gga04140	1	117	0.238706	0.281191	ATG3	http://www.genome.jp/kegg-bin/show_pathway?gga04140/gga:418369%09red
Ribosome	KEGG PATHWAY	gga03010	1	120	0.24398	0.284235	MRPS21	http://www.genome.jp/kegg-bin/show_pathway?gga03010/gga:426666%09red
Purine metabolism	KEGG PATHWAY	gga00230	1	125	0.25269	0.289541	NME7	http://www.genome.jp/kegg-bin/show_pathway?gga00230/gga:100858145%09red
Ubiquitin mediated proteolysis	KEGG PATHWAY	gga04120	1	127	0.256146	0.290048	MID1	http://www.genome.jp/kegg-bin/show_pathway?gga04120/gga:373920%09red
Apoptosis	KEGG PATHWAY	gga04210	1	127	0.256146	0.290048	MCL1	http://www.genome.jp/kegg-bin/show_pathway?gga04210/gga:395674%09red
Adrenergic signaling in cardiomyocytes	KEGG PATHWAY	gga04261	1	128	0.257869	0.290291	ATP1B1	http://www.genome.jp/kegg-bin/show_pathway?gga04261/gga:396529%09red
Wnt signaling pathway	KEGG PATHWAY	gga04310	1	141	0.279906	0.312359	VANGL1	http://www.genome.jp/kegg-bin/show_pathway?gga04310/gga:418337%09red
Calcium signaling pathway	KEGG PATHWAY	gga04020	1	180	0.342233	0.369075	CASQ2	http://www.genome.jp/kegg-bin/show_pathway?gga04020/gga:395198%09red
Metabolic pathways	KEGG PATHWAY	gga01100	4	1290	0.348099	0.373309	MGST3|NME7|ALDH9A1|UCK2	http://www.genome.jp/kegg-bin/show_pathway?gga01100/gga:100858145%09red/gga:424406%09red/gga:424405%09red/gga:424404%09red
Focal adhesion	KEGG PATHWAY	gga04510	1	189	0.355846	0.379503	COL9A1	http://www.genome.jp/kegg-bin/show_pathway?gga04510/gga:771873%09red
Cytokine-cytokine receptor interaction	KEGG PATHWAY	gga04060	1	202	0.375022	0.396658	TNFSF13B	http://www.genome.jp/kegg-bin/show_pathway?gga04060/gga:374229%09red
Endocytosis	KEGG PATHWAY	gga04144	1	228	0.411708	0.431901	EPS15	http://www.genome.jp/kegg-bin/show_pathway?gga04144/gga:424633%09red

## Sheet: KEGG of heptanal
Table S2D. KEGG of potential candidate genes in heptanal.
Pathway_name	Database	ID	Input number	Background number	P-Value	Corrected P-Value	Input	Hyperlink
Oxidative phosphorylation	KEGG PATHWAY	gga00190	1	113	0.08706	0.122165	NDUFA13	http://www.genome.jp/kegg-bin/show_pathway?gga00190/gga:100859320%09red
Metabolic pathways	KEGG PATHWAY	gga01100	1	1290	0.652832	0.668192	NDUFA13	http://www.genome.jp/kegg-bin/show_pathway?gga01100/gga:100859320%09red

## Sheet: KEGG of benzaldehyde
Table S2E. KEGG of potential candidate genes in benzaldehyde.
Pathway_name	Database	ID	Input number	Background number	P-Value	Corrected P-Value	Input	Hyperlink
Neuroactive ligand-receptor interaction	KEGG PATHWAY	gga04080	3	333	0.0173881	0.0714996	P2RX1|CHRNA1|CRHR1	http://www.genome.jp/kegg-bin/show_pathway?gga04080/gga:395190%09red/gga:395608%09red/gga:374218%09red
Cell adhesion molecules (CAMs)	KEGG PATHWAY	gga04514	2	122	0.0175041	0.0714996	MPZ|CADM3	http://www.genome.jp/kegg-bin/show_pathway?gga04514/gga:100859605%09red/gga:772356%09red
Adrenergic signaling in cardiomyocytes	KEGG PATHWAY	gga04261	2	128	0.0191287	0.0714996	ATF2|ATP2A3	http://www.genome.jp/kegg-bin/show_pathway?gga04261/gga:395727%09red/gga:395707%09red
Glycosaminoglycan biosynthesis - keratan sulfate	KEGG PATHWAY	gga00533	1	16	0.027429	0.0730757	B4GALT3	http://www.genome.jp/kegg-bin/show_pathway?gga00533/gga:107049101%09red
Calcium signaling pathway	KEGG PATHWAY	gga04020	2	180	0.0356378	0.0790229	P2RX1|ATP2A3	http://www.genome.jp/kegg-bin/show_pathway?gga04020/gga:395190%09red/gga:395707%09red
Other types of O-glycan biosynthesis	KEGG PATHWAY	gga00514	1	22	0.0369336	0.0794296	B4GALT3	http://www.genome.jp/kegg-bin/show_pathway?gga00514/gga:107049101%09red
Mannose type O-glycan biosynthesis	KEGG PATHWAY	gga00515	1	23	0.0385089	0.0794664	B4GALT3	http://www.genome.jp/kegg-bin/show_pathway?gga00515/gga:107049101%09red
Glycosphingolipid biosynthesis - lacto and neolacto series	KEGG PATHWAY	gga00601	1	23	0.0385089	0.0794664	B4GALT3	http://www.genome.jp/kegg-bin/show_pathway?gga00601/gga:107049101%09red
Porphyrin and chlorophyll metabolism	KEGG PATHWAY	gga00860	1	23	0.0385089	0.0794664	PPOX	http://www.genome.jp/kegg-bin/show_pathway?gga00860/gga:107051238%09red
Citrate cycle (TCA cycle)	KEGG PATHWAY	gga00020	1	28	0.0463478	0.0839906	SDHC	http://www.genome.jp/kegg-bin/show_pathway?gga00020/gga:100859641%09red
Endocytosis	KEGG PATHWAY	gga04144	2	228	0.0542769	0.0922707	WIPF1|RABEP1	http://www.genome.jp/kegg-bin/show_pathway?gga04144/gga:424143%09red/gga:395930%09red
MAPK signaling pathway	KEGG PATHWAY	gga04010	2	261	0.0686849	0.108498	RPS6KA2|ATF2	http://www.genome.jp/kegg-bin/show_pathway?gga04010/gga:421570%09red/gga:395727%09red
N-Glycan biosynthesis	KEGG PATHWAY	gga00510	1	49	0.0785964	0.118392	B4GALT3	http://www.genome.jp/kegg-bin/show_pathway?gga00510/gga:107049101%09red
Cardiac muscle contraction	KEGG PATHWAY	gga04260	1	66	0.103922	0.141604	ATP2A3	http://www.genome.jp/kegg-bin/show_pathway?gga04260/gga:395707%09red
Progesterone-mediated oocyte maturation	KEGG PATHWAY	gga04914	1	78	0.121389	0.157585	RPS6KA2	http://www.genome.jp/kegg-bin/show_pathway?gga04914/gga:421570%09red
ECM-receptor interaction	KEGG PATHWAY	gga04512	1	83	0.128569	0.166301	ITGB3	http://www.genome.jp/kegg-bin/show_pathway?gga04512/gga:374209%09red
Oocyte meiosis	KEGG PATHWAY	gga04114	1	99	0.151162	0.186085	RPS6KA2	http://www.genome.jp/kegg-bin/show_pathway?gga04114/gga:421570%09red
Carbon metabolism	KEGG PATHWAY	gga01200	1	102	0.155334	0.189263	SDHC	http://www.genome.jp/kegg-bin/show_pathway?gga01200/gga:100859641%09red
Oxidative phosphorylation	KEGG PATHWAY	gga00190	1	113	0.170461	0.20421	SDHC	http://www.genome.jp/kegg-bin/show_pathway?gga00190/gga:100859641%09red
Necroptosis	KEGG PATHWAY	gga04217	1	131	0.194648	0.227089	USP21	http://www.genome.jp/kegg-bin/show_pathway?gga04217/gga:107057453%09red
Phagosome	KEGG PATHWAY	gga04145	1	132	0.195971	0.227149	ITGB3	http://www.genome.jp/kegg-bin/show_pathway?gga04145/gga:374209%09red
RNA transport	KEGG PATHWAY	gga03013	1	132	0.195971	0.227149	NUP88	http://www.genome.jp/kegg-bin/show_pathway?gga03013/gga:417501%09red
mTOR signaling pathway	KEGG PATHWAY	gga04150	1	140	0.206482	0.237023	RPS6KA2	http://www.genome.jp/kegg-bin/show_pathway?gga04150/gga:421570%09red
Herpes simplex virus 1 infection	KEGG PATHWAY	gga05168	1	150	0.219433	0.247904	ITGB3	http://www.genome.jp/kegg-bin/show_pathway?gga05168/gga:374209%09red
Protein processing in endoplasmic reticulum	KEGG PATHWAY	gga04141	1	153	0.223278	0.250661	DERL2	http://www.genome.jp/kegg-bin/show_pathway?gga04141/gga:417498%09red
Focal adhesion	KEGG PATHWAY	gga04510	1	189	0.268001	0.288609	ITGB3	http://www.genome.jp/kegg-bin/show_pathway?gga04510/gga:374209%09red
Regulation of actin cytoskeleton	KEGG PATHWAY	gga04810	1	190	0.269206	0.288609	ITGB3	http://www.genome.jp/kegg-bin/show_pathway?gga04810/gga:374209%09red
Metabolic pathways	KEGG PATHWAY	gga01100	3	1290	0.354664	0.362794	PPOX|SDHC|B4GALT3	http://www.genome.jp/kegg-bin/show_pathway?gga01100/gga:100859641%09red/gga:107049101%09red/gga:107051238%09red

## Sheet: KEGG of (E,E)-2,4-nonadienal
Table S2F. KEGG of potential candidate genes in (E,E)-2,4-nonadienal.
Pathway_name	Database	ID	Input number	Background number	P-Value	Corrected P-Value	Input	Hyperlink
Oocyte meiosis	KEGG PATHWAY	gga04114	2	99	0.0149387	0.0943026	RPS6KA2|BTRC	http://www.genome.jp/kegg-bin/show_pathway?gga04114/gga:421570%09red/gga:423854%09red
Ubiquinone and other terpenoid-quinone biosynthesis	KEGG PATHWAY	gga00130	1	9	0.0182837	0.0943026	COQ6	http://www.genome.jp/kegg-bin/show_pathway?gga00130/gga:423342%09red
RNA transport	KEGG PATHWAY	gga03013	2	132	0.0253721	0.0943026	GEMIN2|PNN	http://www.genome.jp/kegg-bin/show_pathway?gga03013/gga:423336%09red/gga:423338%09red
Protein processing in endoplasmic reticulum	KEGG PATHWAY	gga04141	2	153	0.0331687	0.0958722	SEC23A|SEC62	http://www.genome.jp/kegg-bin/show_pathway?gga04141/gga:423335%09red/gga:424993%09red
Other types of O-glycan biosynthesis	KEGG PATHWAY	gga00514	1	22	0.0415647	0.102975	POGLUT1	http://www.genome.jp/kegg-bin/show_pathway?gga00514/gga:418455%09red
Protein export	KEGG PATHWAY	gga03060	1	23	0.0433331	0.104073	SEC62	http://www.genome.jp/kegg-bin/show_pathway?gga03060/gga:424993%09red
Intestinal immune network for IgA production	KEGG PATHWAY	gga04672	1	36	0.0660332	0.127784	CD80	http://www.genome.jp/kegg-bin/show_pathway?gga04672/gga:768950%09red
Endocytosis	KEGG PATHWAY	gga04144	2	228	0.0671559	0.127784	PRKCI|SH3KBP1	http://www.genome.jp/kegg-bin/show_pathway?gga04144/gga:424991%09red/gga:418608%09red
Hedgehog signaling pathway	KEGG PATHWAY	gga04340	1	41	0.0746232	0.129439	BTRC	http://www.genome.jp/kegg-bin/show_pathway?gga04340/gga:423854%09red
MAPK signaling pathway	KEGG PATHWAY	gga04010	2	261	0.0846168	0.136211	MECOM|RPS6KA2	http://www.genome.jp/kegg-bin/show_pathway?gga04010/gga:421570%09red/gga:424997%09red
Pyrimidine metabolism	KEGG PATHWAY	gga00240	1	59	0.104912	0.155981	ENTPD5	http://www.genome.jp/kegg-bin/show_pathway?gga00240/gga:423343%09red
mRNA surveillance pathway	KEGG PATHWAY	gga03015	1	70	0.122943	0.174143	PNN	http://www.genome.jp/kegg-bin/show_pathway?gga03015/gga:423338%09red
Progesterone-mediated oocyte maturation	KEGG PATHWAY	gga04914	1	78	0.135833	0.184392	RPS6KA2	http://www.genome.jp/kegg-bin/show_pathway?gga04914/gga:421570%09red
Toll-like receptor signaling pathway	KEGG PATHWAY	gga04620	1	84	0.145379	0.193609	CD80	http://www.genome.jp/kegg-bin/show_pathway?gga04620/gga:768950%09red
Insulin signaling pathway	KEGG PATHWAY	gga04910	1	121	0.202007	0.241549	PRKCI	http://www.genome.jp/kegg-bin/show_pathway?gga04910/gga:424991%09red
Cell adhesion molecules (CAMs)	KEGG PATHWAY	gga04514	1	122	0.203486	0.242286	CD80	http://www.genome.jp/kegg-bin/show_pathway?gga04514/gga:768950%09red
Purine metabolism	KEGG PATHWAY	gga00230	1	125	0.207905	0.245468	ENTPD5	http://www.genome.jp/kegg-bin/show_pathway?gga00230/gga:423343%09red
Ubiquitin mediated proteolysis	KEGG PATHWAY	gga04120	1	127	0.210838	0.247889	BTRC	http://www.genome.jp/kegg-bin/show_pathway?gga04120/gga:423854%09red
mTOR signaling pathway	KEGG PATHWAY	gga04150	1	140	0.229645	0.265556	RPS6KA2	http://www.genome.jp/kegg-bin/show_pathway?gga04150/gga:421570%09red
Wnt signaling pathway	KEGG PATHWAY	gga04310	1	141	0.231073	0.266113	BTRC	http://www.genome.jp/kegg-bin/show_pathway?gga04310/gga:423854%09red
Cellular senescence	KEGG PATHWAY	gga04218	1	143	0.233922	0.268294	BTRC	http://www.genome.jp/kegg-bin/show_pathway?gga04218/gga:423854%09red
Tight junction	KEGG PATHWAY	gga04530	1	156	0.252191	0.285378	PRKCI	http://www.genome.jp/kegg-bin/show_pathway?gga04530/gga:424991%09red
Cytokine-cytokine receptor interaction	KEGG PATHWAY	gga04060	1	202	0.313479	0.345441	CCR6	http://www.genome.jp/kegg-bin/show_pathway?gga04060/gga:769278%09red
Metabolic pathways	KEGG PATHWAY	gga01100	2	1290	0.696212	0.706266	ENTPD5|COQ6	http://www.genome.jp/kegg-bin/show_pathway?gga01100/gga:423343%09red/gga:423342%09red

## Sheet: KEGG of octanal
Table S2G. KEGG of potential candidate genes in octanal.
Pathway_name	Database	ID	Input number	Background number	P-Value	Corrected P-Value	Input	Hyperlink
Cytosolic DNA-sensing pathway	KEGG PATHWAY	gga04623	2	44	0.000978	0.053904	IL1B|POLR1D	http://www.genome.jp/kegg-bin/show_pathway?gga04623/gga:428713%09red/gga:395196%09red
Adrenergic signaling in cardiomyocytes	KEGG PATHWAY	gga04261	2	128	0.007522	0.053904	ADRA1A|MYH7B	http://www.genome.jp/kegg-bin/show_pathway?gga04261/gga:428203%09red/gga:395279%09red
Necroptosis	KEGG PATHWAY	gga04217	2	131	0.00786	0.053904	IL1B|PPIA	http://www.genome.jp/kegg-bin/show_pathway?gga04217/gga:776282%09red/gga:395196%09red
Influenza A	KEGG PATHWAY	gga05164	2	135	0.008322	0.053904	TRIM25|IL1B	http://www.genome.jp/kegg-bin/show_pathway?gga05164/gga:417401%09red/gga:395196%09red
Calcium signaling pathway	KEGG PATHWAY	gga04020	2	180	0.014314	0.05604	ADRA1A|EDNRB2	http://www.genome.jp/kegg-bin/show_pathway?gga04020/gga:428203%09red/gga:373909%09red
RNA polymerase	KEGG PATHWAY	gga03020	1	24	0.024867	0.068292	POLR1D	http://www.genome.jp/kegg-bin/show_pathway?gga03020/gga:428713%09red
Citrate cycle (TCA cycle)	KEGG PATHWAY	gga00020	1	28	0.02879	0.070326	OGDH	http://www.genome.jp/kegg-bin/show_pathway?gga00020/gga:426429%09red
SNARE interactions in vesicular transport	KEGG PATHWAY	gga04130	1	29	0.029769	0.070326	VAMP7	http://www.genome.jp/kegg-bin/show_pathway?gga04130/gga:422297%09red
Nicotinate and nicotinamide metabolism	KEGG PATHWAY	gga00760	1	31	0.031723	0.070326	NT5DC4	http://www.genome.jp/kegg-bin/show_pathway?gga00760/gga:100858617%09red
Neuroactive ligand-receptor interaction	KEGG PATHWAY	gga04080	2	333	0.044304	0.084972	ADRA1A|EDNRB2	http://www.genome.jp/kegg-bin/show_pathway?gga04080/gga:428203%09red/gga:373909%09red
RIG-I-like receptor signaling pathway	KEGG PATHWAY	gga04622	1	57	0.056786	0.096746	TRIM25	http://www.genome.jp/kegg-bin/show_pathway?gga04622/gga:417401%09red
Pyrimidine metabolism	KEGG PATHWAY	gga00240	1	59	0.058687	0.097108	NT5DC4	http://www.genome.jp/kegg-bin/show_pathway?gga00240/gga:100858617%09red
Glycerolipid metabolism	KEGG PATHWAY	gga00561	1	60	0.059637	0.097108	DGKE	http://www.genome.jp/kegg-bin/show_pathway?gga00561/gga:770911%09red
Cardiac muscle contraction	KEGG PATHWAY	gga04260	1	66	0.065315	0.102718	MYH7B	http://www.genome.jp/kegg-bin/show_pathway?gga04260/gga:395279%09red
Salmonella infection	KEGG PATHWAY	gga05132	1	70	0.069083	0.105607	IL1B	http://www.genome.jp/kegg-bin/show_pathway?gga05132/gga:395196%09red
Toll-like receptor signaling pathway	KEGG PATHWAY	gga04620	1	84	0.082154	0.12093	IL1B	http://www.genome.jp/kegg-bin/show_pathway?gga04620/gga:395196%09red
C-type lectin receptor signaling pathway	KEGG PATHWAY	gga04625	1	87	0.084932	0.12305	IL1B	http://www.genome.jp/kegg-bin/show_pathway?gga04625/gga:395196%09red
AGE-RAGE signaling pathway in diabetic complications	KEGG PATHWAY	gga04933	1	90	0.087701	0.123535	IL1B	http://www.genome.jp/kegg-bin/show_pathway?gga04933/gga:395196%09red
Phosphatidylinositol signaling system	KEGG PATHWAY	gga04070	1	91	0.088623	0.123535	DGKE	http://www.genome.jp/kegg-bin/show_pathway?gga04070/gga:770911%09red
Melanogenesis	KEGG PATHWAY	gga04916	1	91	0.088623	0.123535	EDNRB2	http://www.genome.jp/kegg-bin/show_pathway?gga04916/gga:373909%09red
Glycerophospholipid metabolism	KEGG PATHWAY	gga00564	1	94	0.091382	0.12548	DGKE	http://www.genome.jp/kegg-bin/show_pathway?gga00564/gga:770911%09red
Carbon metabolism	KEGG PATHWAY	gga01200	1	102	0.098701	0.131601	OGDH	http://www.genome.jp/kegg-bin/show_pathway?gga01200/gga:426429%09red
Vascular smooth muscle contraction	KEGG PATHWAY	gga04270	1	117	0.112272	0.14651	ADRA1A	http://www.genome.jp/kegg-bin/show_pathway?gga04270/gga:428203%09red
Cell adhesion molecules (CAMs)	KEGG PATHWAY	gga04514	1	122	0.116751	0.149489	CDH5	http://www.genome.jp/kegg-bin/show_pathway?gga04514/gga:374068%09red
NOD-like receptor signaling pathway	KEGG PATHWAY	gga04621	1	124	0.118537	0.149489	IL1B	http://www.genome.jp/kegg-bin/show_pathway?gga04621/gga:395196%09red
Purine metabolism	KEGG PATHWAY	gga00230	1	125	0.119429	0.149489	NT5DC4	http://www.genome.jp/kegg-bin/show_pathway?gga00230/gga:100858617%09red
Metabolic pathways	KEGG PATHWAY	gga01100	3	1290	0.138417	0.170932	NT5DC4|OGDH|DGKE	http://www.genome.jp/kegg-bin/show_pathway?gga01100/gga:770911%09red/gga:426429%09red/gga:100858617%09red
Herpes simplex virus 1 infection	KEGG PATHWAY	gga05168	1	150	0.141441	0.173501	IL1B	http://www.genome.jp/kegg-bin/show_pathway?gga05168/gga:395196%09red
Protein processing in endoplasmic reticulum	KEGG PATHWAY	gga04141	1	153	0.144047	0.175527	EDEM2	http://www.genome.jp/kegg-bin/show_pathway?gga04141/gga:770034%09red
Cytokine-cytokine receptor interaction	KEGG PATHWAY	gga04060	1	202	0.18555	0.209455	IL1B	http://www.genome.jp/kegg-bin/show_pathway?gga04060/gga:395196%09red
Endocytosis	KEGG PATHWAY	gga04144	1	228	0.206781	0.230592	RAB11FIP4	http://www.genome.jp/kegg-bin/show_pathway?gga04144/gga:427808%09red
MAPK signaling pathway	KEGG PATHWAY	gga04010	1	261	0.232966	0.249219	IL1B	http://www.genome.jp/kegg-bin/show_pathway?gga04010/gga:395196%09red

## Sheet: KEGG of (E)-2-decenal
Table S2H. KEGG of potential candidate genes in (E)-2-decenal.
Pathway_name	Database	ID	Input number	Background number	P-Value	Corrected P-Value	Input	Hyperlink
Neomycin, kanamycin and gentamicin biosynthesis	KEGG PATHWAY	gga00524	1	5	0.00777166	0.058603	HK2	http://www.genome.jp/kegg-bin/show_pathway?gga00524/gga:374044%09red
Terpenoid backbone biosynthesis	KEGG PATHWAY	gga00900	1	19	0.0256789	0.0625923	PCYOX1	http://www.genome.jp/kegg-bin/show_pathway?gga00900/gga:426297%09red
Starch and sucrose metabolism	KEGG PATHWAY	gga00500	1	33	0.0432732	0.0787572	HK2	http://www.genome.jp/kegg-bin/show_pathway?gga00500/gga:374044%09red
MAPK signaling pathway	KEGG PATHWAY	gga04010	2	261	0.0456487	0.07968	TGFA|RPS6KA5	http://www.genome.jp/kegg-bin/show_pathway?gga04010/gga:414743%09red/gga:423408%09red
Fructose and mannose metabolism	KEGG PATHWAY	gga00051	1	35	0.0457614	0.07968	HK2	http://www.genome.jp/kegg-bin/show_pathway?gga00051/gga:374044%09red
Galactose metabolism	KEGG PATHWAY	gga00052	1	35	0.0457614	0.07968	HK2	http://www.genome.jp/kegg-bin/show_pathway?gga00052/gga:374044%09red
Homologous recombination	KEGG PATHWAY	gga03440	1	38	0.049482	0.0828748	RAD51C	http://www.genome.jp/kegg-bin/show_pathway?gga03440/gga:417626%09red
Amino sugar and nucleotide sugar metabolism	KEGG PATHWAY	gga00520	1	48	0.061783	0.0931865	HK2	http://www.genome.jp/kegg-bin/show_pathway?gga00520/gga:374044%09red
Fanconi anemia pathway	KEGG PATHWAY	gga03460	1	50	0.0642246	0.0952898	RAD51C	http://www.genome.jp/kegg-bin/show_pathway?gga03460/gga:417626%09red
Glycolysis / Gluconeogenesis	KEGG PATHWAY	gga00010	1	53	0.0678755	0.0985639	HK2	http://www.genome.jp/kegg-bin/show_pathway?gga00010/gga:374044%09red
Neuroactive ligand-receptor interaction	KEGG PATHWAY	gga04080	2	333	0.0700116	0.0999604	CGA|HTR1E	http://www.genome.jp/kegg-bin/show_pathway?gga04080/gga:421829%09red/gga:771973%09red
ErbB signaling pathway	KEGG PATHWAY	gga04012	1	78	0.0977685	0.1259	TGFA	http://www.genome.jp/kegg-bin/show_pathway?gga04012/gga:414743%09red
GnRH signaling pathway	KEGG PATHWAY	gga04912	1	84	0.104804	0.133698	CGA	http://www.genome.jp/kegg-bin/show_pathway?gga04912/gga:421829%09red
TGF-beta signaling pathway	KEGG PATHWAY	gga04350	1	90	0.111786	0.139349	GDF7	http://www.genome.jp/kegg-bin/show_pathway?gga04350/gga:428655%09red
Carbon metabolism	KEGG PATHWAY	gga01200	1	102	0.125592	0.154444	HK2	http://www.genome.jp/kegg-bin/show_pathway?gga01200/gga:374044%09red
Insulin signaling pathway	KEGG PATHWAY	gga04910	1	121	0.147028	0.175278	HK2	http://www.genome.jp/kegg-bin/show_pathway?gga04910/gga:374044%09red
Adrenergic signaling in cardiomyocytes	KEGG PATHWAY	gga04261	1	128	0.154796	0.181371	RPS6KA5	http://www.genome.jp/kegg-bin/show_pathway?gga04261/gga:423408%09red
Cytokine-cytokine receptor interaction	KEGG PATHWAY	gga04060	1	202	0.232844	0.253252	GDF7	http://www.genome.jp/kegg-bin/show_pathway?gga04060/gga:428655%09red
Metabolic pathways	KEGG PATHWAY	gga01100	1	1290	0.821947	0.821947	HK2	http://www.genome.jp/kegg-bin/show_pathway?gga01100/gga:374044%09red

## Sheet: KEGG of nonanal
Table S2I. KEGG of potential candidate genes in nonanal.
Pathway_name	Database	ID	Input number	Background number	P-Value	Corrected P-Value	Input	Hyperlink
Metabolic pathways	KEGG PATHWAY	gga01100	12	1290	0.000891538	0.0335813	CYP1A1|CYP1A2|GPAM|COX5A|PPCDC|UQCR10|MPI|BTD|MAN1C1|MECR|ACSL5|MTMR3	http://www.genome.jp/kegg-bin/show_pathway?gga01100/gga:769765%09red/gga:427477%09red/gga:770937%09red/gga:417015%09red/gga:419601%09red/gga:420639%09red/gga:769735%09red/gga:423895%09red/gga:423896%09red/gga:419588%09red/gga:396051%09red/gga:396052%09red
Fatty acid biosynthesis	KEGG PATHWAY	gga00061	2	17	0.00169023	0.047749	MECR|ACSL5	http://www.genome.jp/kegg-bin/show_pathway?gga00061/gga:419601%09red/gga:423896%09red
Peroxisome	KEGG PATHWAY	gga04146	3	79	0.00237067	0.0563971	HACL1|PHYH|ACSL5	http://www.genome.jp/kegg-bin/show_pathway?gga04146/gga:420638%09red/gga:426601%09red/gga:423896%09red
Metabolism of xenobiotics by cytochrome P450	KEGG PATHWAY	gga00980	2	36	0.00667929	0.10244	CYP1A1|CYP1A2	http://www.genome.jp/kegg-bin/show_pathway?gga00980/gga:396051%09red/gga:396052%09red
Steroid hormone biosynthesis	KEGG PATHWAY	gga00140	2	37	0.00702572	0.10244	CYP1A1|CYP1A2	http://www.genome.jp/kegg-bin/show_pathway?gga00140/gga:396051%09red/gga:396052%09red
Retinol metabolism	KEGG PATHWAY	gga00830	2	39	0.00774255	0.10293	CYP1A1|CYP1A2	http://www.genome.jp/kegg-bin/show_pathway?gga00830/gga:396051%09red/gga:396052%09red
Tryptophan metabolism	KEGG PATHWAY	gga00380	2	39	0.00774255	0.10293	CYP1A1|CYP1A2	http://www.genome.jp/kegg-bin/show_pathway?gga00380/gga:396051%09red/gga:396052%09red
Fatty acid metabolism	KEGG PATHWAY	gga01212	2	53	0.0136207	0.105191	MECR|ACSL5	http://www.genome.jp/kegg-bin/show_pathway?gga01212/gga:419601%09red/gga:423896%09red
Cardiac muscle contraction	KEGG PATHWAY	gga04260	2	66	0.0203408	0.105191	UQCR10|COX5A	http://www.genome.jp/kegg-bin/show_pathway?gga04260/gga:769735%09red/gga:770937%09red
Oocyte meiosis	KEGG PATHWAY	gga04114	2	99	0.0421384	0.109463	YWHAZ|SMC3	http://www.genome.jp/kegg-bin/show_pathway?gga04114/gga:425619%09red/gga:395188%09red
Spliceosome	KEGG PATHWAY	gga03040	2	107	0.048318	0.112616	SRSF4|SYF2	http://www.genome.jp/kegg-bin/show_pathway?gga03040/gga:419600%09red/gga:419593%09red
Pantothenate and CoA biosynthesis	KEGG PATHWAY	gga00770	1	15	0.0503283	0.112616	PPCDC	http://www.genome.jp/kegg-bin/show_pathway?gga00770/gga:427477%09red
Oxidative phosphorylation	KEGG PATHWAY	gga00190	2	113	0.0531554	0.11437	UQCR10|COX5A	http://www.genome.jp/kegg-bin/show_pathway?gga00190/gga:769735%09red/gga:770937%09red
Cell cycle	KEGG PATHWAY	gga04110	2	114	0.0539778	0.115085	YWHAZ|SMC3	http://www.genome.jp/kegg-bin/show_pathway?gga04110/gga:425619%09red/gga:395188%09red
RNA transport	KEGG PATHWAY	gga03013	2	132	0.0695227	0.134868	SRRM1|RPP25	http://www.genome.jp/kegg-bin/show_pathway?gga03013/gga:428216%09red/gga:430848%09red
Fatty acid elongation	KEGG PATHWAY	gga00062	1	25	0.0805051	0.139419	MECR	http://www.genome.jp/kegg-bin/show_pathway?gga00062/gga:419601%09red
SNARE interactions in vesicular transport	KEGG PATHWAY	gga04130	1	29	0.0923091	0.151173	VTI1A	http://www.genome.jp/kegg-bin/show_pathway?gga04130/gga:770885%09red
Fatty acid degradation	KEGG PATHWAY	gga00071	1	33	0.103963	0.163733	ACSL5	http://www.genome.jp/kegg-bin/show_pathway?gga00071/gga:423896%09red
Ferroptosis	KEGG PATHWAY	gga04216	1	34	0.106854	0.165972	ACSL5	http://www.genome.jp/kegg-bin/show_pathway?gga04216/gga:423896%09red
Fructose and mannose metabolism	KEGG PATHWAY	gga00051	1	35	0.109735	0.168137	MPI	http://www.genome.jp/kegg-bin/show_pathway?gga00051/gga:769765%09red
Basal transcription factors	KEGG PATHWAY	gga03022	1	38	0.118324	0.177682	TAF12	http://www.genome.jp/kegg-bin/show_pathway?gga03022/gga:419585%09red
Amino sugar and nucleotide sugar metabolism	KEGG PATHWAY	gga00520	1	48	0.146367	0.199872	MPI	http://www.genome.jp/kegg-bin/show_pathway?gga00520/gga:769765%09red
N-Glycan biosynthesis	KEGG PATHWAY	gga00510	1	49	0.149122	0.201806	MAN1C1	http://www.genome.jp/kegg-bin/show_pathway?gga00510/gga:419588%09red
Endocytosis	KEGG PATHWAY	gga04144	2	228	0.169531	0.220196	LDLRAP1|ASAP3	http://www.genome.jp/kegg-bin/show_pathway?gga04144/gga:419589%09red/gga:429809%09red
Mitophagy - animal	KEGG PATHWAY	gga04137	1	58	0.173529	0.223462	OPTN	http://www.genome.jp/kegg-bin/show_pathway?gga04137/gga:374079%09red
Glycerolipid metabolism	KEGG PATHWAY	gga00561	1	60	0.178858	0.227729	GPAM	http://www.genome.jp/kegg-bin/show_pathway?gga00561/gga:423895%09red
PPAR signaling pathway	KEGG PATHWAY	gga03320	1	64	0.189415	0.238483	ACSL5	http://www.genome.jp/kegg-bin/show_pathway?gga03320/gga:423896%09red
Adipocytokine signaling pathway	KEGG PATHWAY	gga04920	1	64	0.189415	0.238483	ACSL5	http://www.genome.jp/kegg-bin/show_pathway?gga04920/gga:423896%09red
Ribosome biogenesis in eukaryotes	KEGG PATHWAY	gga03008	1	67	0.197244	0.244259	RPP25	http://www.genome.jp/kegg-bin/show_pathway?gga03008/gga:430848%09red
RNA degradation	KEGG PATHWAY	gga03018	1	70	0.204999	0.251793	EDC3	http://www.genome.jp/kegg-bin/show_pathway?gga03018/gga:415294%09red
mRNA surveillance pathway	KEGG PATHWAY	gga03015	1	70	0.204999	0.251793	SRRM1	http://www.genome.jp/kegg-bin/show_pathway?gga03015/gga:428216%09red
Inositol phosphate metabolism	KEGG PATHWAY	gga00562	1	71	0.207568	0.252548	MTMR3	http://www.genome.jp/kegg-bin/show_pathway?gga00562/gga:417015%09red
MAPK signaling pathway	KEGG PATHWAY	gga04010	2	261	0.207849	0.252548	DUSP5|PDGFA	http://www.genome.jp/kegg-bin/show_pathway?gga04010/gga:423890%09red/gga:374196%09red
Gap junction	KEGG PATHWAY	gga04540	1	84	0.240222	0.282027	PDGFA	http://www.genome.jp/kegg-bin/show_pathway?gga04540/gga:374196%09red
TGF-beta signaling pathway	KEGG PATHWAY	gga04350	1	90	0.254842	0.292357	ID3	http://www.genome.jp/kegg-bin/show_pathway?gga04350/gga:395281%09red
Phosphatidylinositol signaling system	KEGG PATHWAY	gga04070	1	91	0.257251	0.29363	MTMR3	http://www.genome.jp/kegg-bin/show_pathway?gga04070/gga:417015%09red
Glycerophospholipid metabolism	KEGG PATHWAY	gga00564	1	94	0.264434	0.299559	GPAM	http://www.genome.jp/kegg-bin/show_pathway?gga00564/gga:423895%09red
Autophagy - animal	KEGG PATHWAY	gga04140	1	117	0.317268	0.351484	MTMR3	http://www.genome.jp/kegg-bin/show_pathway?gga04140/gga:417015%09red
Insulin signaling pathway	KEGG PATHWAY	gga04910	1	121	0.326067	0.358594	PRKAR1B	http://www.genome.jp/kegg-bin/show_pathway?gga04910/gga:416446%09red
Herpes simplex virus 1 infection	KEGG PATHWAY	gga05168	1	150	0.386593	0.414076	SRSF4	http://www.genome.jp/kegg-bin/show_pathway?gga05168/gga:419600%09red
Protein processing in endoplasmic reticulum	KEGG PATHWAY	gga04141	1	153	0.392539	0.418462	MAN1C1	http://www.genome.jp/kegg-bin/show_pathway?gga04141/gga:419588%09red
Tight junction	KEGG PATHWAY	gga04530	1	156	0.398429	0.422746	NF2	http://www.genome.jp/kegg-bin/show_pathway?gga04530/gga:395158%09red
Focal adhesion	KEGG PATHWAY	gga04510	1	189	0.459608	0.473218	PDGFA	http://www.genome.jp/kegg-bin/show_pathway?gga04510/gga:374196%09red
Regulation of actin cytoskeleton	KEGG PATHWAY	gga04810	1	190	0.461362	0.473945	PDGFA	http://www.genome.jp/kegg-bin/show_pathway?gga04810/gga:374196%09red
Neuroactive ligand-receptor interaction	KEGG PATHWAY	gga04080	1	333	0.66217	0.666594	OPRD1	http://www.genome.jp/kegg-bin/show_pathway?gga04080/gga:429951%09red

## Sheet: KEGG of decanal
Table S2J. KEGG of potential candidate genes in decanal.
Pathway_name	Database	ID	Input number	Background number	P-Value	Corrected P-Value	Input	Hyperlink
Protein processing in endoplasmic reticulum	KEGG PATHWAY	gga04141	2	153	0.0105447	0.0443306	SAR1B|SEC24A	http://www.genome.jp/kegg-bin/show_pathway?gga04141/gga:416313%09red/gga:416314%09red
Folate biosynthesis	KEGG PATHWAY	gga00790	1	28	0.0287904	0.0616938	PCBD2	http://www.genome.jp/kegg-bin/show_pathway?gga00790/gga:374030%09red
Homologous recombination	KEGG PATHWAY	gga03440	1	38	0.0385327	0.0766011	XRCC3	http://www.genome.jp/kegg-bin/show_pathway?gga03440/gga:423485%09red
Adherens junction	KEGG PATHWAY	gga04520	1	70	0.0690825	0.108997	SSX2IP	http://www.genome.jp/kegg-bin/show_pathway?gga04520/gga:424532%09red
C-type lectin receptor signaling pathway	KEGG PATHWAY	gga04625	1	87	0.0849315	0.122927	BCL10	http://www.genome.jp/kegg-bin/show_pathway?gga04625/gga:424528%09red
Regulation of actin cytoskeleton	KEGG PATHWAY	gga04810	1	190	0.175568	0.21145	FGF18	http://www.genome.jp/kegg-bin/show_pathway?gga04810/gga:395453%09red
MAPK signaling pathway	KEGG PATHWAY	gga04010	1	261	0.232966	0.265099	FGF18	http://www.genome.jp/kegg-bin/show_pathway?gga04010/gga:395453%09red
Neuroactive ligand-receptor interaction	KEGG PATHWAY	gga04080	1	333	0.287251	0.311819	LPAR3	http://www.genome.jp/kegg-bin/show_pathway?gga04080/gga:771215%09red
Metabolic pathways	KEGG PATHWAY	gga01100	1	1290	0.737159	0.737159	PCBD2	http://www.genome.jp/kegg-bin/show_pathway?gga01100/gga:374030%09red

[truncated: 1 more sheets: KEGG of octadecanal]
